# Supplementary material
Source: PubMed Central journal article supplement (PMC8035241)
Supplement: NIHMS1657563-supplement-Revised_SDC.pdf [file NIHMS1657563-supplement-Revised_SDC.pdf]

Supplementary Table S1.  
 PCR primers used for Sanger sequencing

| Gene                  | Direction | Sequence (5' to 3')      |
|-----------------------|-----------|--------------------------|
| <i>BRAF</i> exon 15   | Forward   | TCCTTTACTTACTACACCTCAGAT |
|                       | Reverse   | AGTGGAAAAATAGCCTCAAT     |
| <i>AKT1</i> exon 2    | Forward   | AGGCACATCTGTCCTGGCAC     |
|                       | Reverse   | AAATCTGAATCCCGAGAGGCC    |
| <i>HRAS</i> exon 2    | Forward   | CAGGCCCTGAGGAGCGATG      |
|                       | Reverse   | TTCGTCCACAAAATGGTTCT     |
| <i>HRAS</i> exon 3    | Forward   | TCCTGCAGGATTCCTACCGG     |
|                       | Reverse   | GGTTCACCTGTACTGGTGGGA    |
| <i>KRAS</i> exon 2    | Forward   | GACTGAATATAAACTTGTGG     |
|                       | Reverse   | CTGTATCAAAGAATGGTCCT     |
| <i>KRAS</i> exon 3    | Forward   | GACTGTGTTTCTCCCTTCT      |
|                       | Reverse   | TGGCAAATACACAAAGAAAG     |
| <i>PIK3CA</i> exon 9  | Forward   | TGACAAAGAAGAGCTCAAAGC    |
|                       | Reverse   | TTAGCACTTACCTGTGACTCCA   |
| <i>PIK3CA</i> exon 20 | Forward   | TGATGACATTGCATACATTCG    |
|                       | Reverse   | TGTGTGGAAGATCCAATCCA     |
